# Supplementary material for: Bitcoin: A life in crises
Source: PLoS One. 2022 Sep 30;17(9):e0274165. doi: 10.1371/journal.pone.0274165 (PMC9524670; doi:10.1371/journal.pone.0274165)
Supplement: S1 Dataset — (CSV) [file pone.0274165.s010.csv]

Category: All categories
City	bitcoin price: (1/1/08 - 11/3/21)
London	100
New York	92
